# Supplementary material
Source: PubMed Central journal article supplement (PMC2966125)
Supplement: supp_M110.116855_jbc.M110.116855-1.pdf [file supp_M110.116855_jbc.M110.116855-1.pdf]

**Supplementary Table 1. Yeast strains used in this study**

| Strain | Relevant Genotype                                                                            | Source* |
|--------|----------------------------------------------------------------------------------------------|---------|
| MKY5   | <i>MATa ade2-1 can1-100 his3-11 leu2-3,112 trp1-1 ura3-1 LYS2</i>                            |         |
| MKY6   | <i>MATA ADE2 can1-100 his3-11 leu2-3,112 trp1-1 ura3-1 lys2Δ</i>                             |         |
| MKY7   | <i>MATA ade2-1 can1-100 his3-11 leu2-3,112 trp1-1 ura3-1 LYS2</i>                            |         |
| MKY399 | <i>MATa ADE2 can1-100 his3-11 leu2-3,112 trp1-1 ura3-1 lys2Δ</i>                             |         |
| MKY10  | <i>MATa his4</i>                                                                             |         |
| MKY11  | <i>MATA his4</i>                                                                             |         |
| MKY921 | MKY5, <i>dot1Δ::his5MX6</i>                                                                  |         |
| MKY922 | MKY5, <i>rtt107Δ::KANMX6 lys2Δ</i>                                                           |         |
| MKY923 | MKY7, <i>rtt107Δ::KANMX6 dot1Δ::his5MX6</i>                                                  |         |
| MKY924 | MKY7, <i>slx4Δ::KANMX6</i>                                                                   |         |
| MKY925 | MKY5, <i>slx4Δ::KANMX6 dot1Δ::his5MX6</i>                                                    |         |
| MKY927 | MKY5, <i>bre1Δ::HYGMX6 lys2Δ</i>                                                             |         |
| MKY928 | MKY5, <i>rtt107Δ::KANMX6</i>                                                                 |         |
| MKY929 | MKY5, <i>rtt107Δ::KANMX6 bre1Δ::HYGMX6 lys2Δ</i>                                             |         |
| MKY930 | MKY5, <i>slx4Δ::KANMX6 lys2Δ</i>                                                             |         |
| MKY931 | MKY5, <i>slx4Δ::KANMX6 bre1Δ::HYGMX6 lys2Δ</i>                                               |         |
| MKY932 | MKY5, <i>[pRS315]</i>                                                                        |         |
| MKY933 | MKY5, <i>[pRS315, DOT1]</i>                                                                  |         |
| MKY934 | MKY5, <i>[pRS315, dot1G401R]</i>                                                             |         |
| MKY935 | MKY5, <i>[pRS315, dot1G401A]</i>                                                             |         |
| MKY936 | MKY7, <i>rtt107Δ::KANMX6 dot1Δ::his5MX6 [pRS315]</i>                                         |         |
| MKY937 | MKY7, <i>rtt107Δ::KANMX6 dot1Δ::his5MX6 [pRS315, DOT1]</i>                                   |         |
| MKY938 | MKY7, <i>rtt107Δ::KANMX6 dot1Δ::his5MX6 [pRS315, dot1G401R]</i>                              |         |
| MKY939 | MKY7, <i>rtt107Δ::KANMX6 dot1Δ::his5MX6 [pRS315, dot1G401A]</i>                              |         |
| MKY940 | <i>MATA/a ADE2/ade2-1 can1-100/can1-100 his3-11/his3-11 leu2-3,112/leu2-3,112 LYS2/lys2Δ</i> |         |
| MKY941 | MKY940, <i>rtt107Δ::KANMX6/rtt107Δ::NATMX6</i>                                               |         |
| MKY942 | MKY940, <i>dot1Δ::his5MX6/dot1Δ::his5MX6</i>                                                 |         |
| MKY943 | MKY940, <i>rtt107Δ::KANMX6/rtt107Δ::KANMX6 dot1Δ::his5MX6/ dot1Δ::his5MX6</i>                |         |
| MKY944 | MKY7, <i>Rad 52-GFP::NATMX6</i>                                                              |         |
| MKY945 | MKY7, <i>rtt107Δ::KANMX6 Rad 52-GFP::NATMX6</i>                                              |         |
| MKY946 | MKY7, <i>dot1Δ::his5MX6 Rad 52-GFP::NATMX6</i>                                               |         |
| MKY947 | MKY7, <i>rtt107Δ::KANMX6 dot1Δ::his5MX6 Rad 52-GFP::NATMX6</i>                               |         |
| MKY949 | MKY7, <i>dot1Δ::his5MX6</i>                                                                  |         |
| MKY950 | MKY7, <i>rtt107Δ::KANMX6</i>                                                                 |         |
| MKY951 | MKY399, <i>rtt107Δ::KANMX6</i>                                                               |         |
| MKY952 | MKY6, <i>dot1Δ::his5MX6</i>                                                                  |         |
| MKY953 | MKY399, <i>rev1Δ::HYGMX6</i>                                                                 |         |
| MKY954 | MKY6, <i>rtt107Δ::KANMX6 dot1Δ::his5MX6</i>                                                  |         |
| MKY955 | MKY399, <i>dot1Δ::his5MX6 rev1Δ::HYGMX6</i>                                                  |         |
| MKY956 | MKY399, <i>rtt107Δ::KANMX6 rev1Δ::HYGMX6</i>                                                 |         |
| MKY957 | MKY6, <i>rtt107Δ::KANMX6 dot1Δ::his5MX6 rev1Δ::HYGMX6</i>                                    |         |
| MKY958 | MKY5, <i>rev3Δ::HYGMX6</i>                                                                   |         |

MKY959 MKY5, *rtt107Δ::KANMX6 dot1Δ::his5MX6*  
 MKY960 MKY5, *dot1Δ::his5MX6 rev3Δ::HYGMX6*  
 MKY961 MKY5, *rtt107Δ::KANMX6 rev3Δ::HYGMX6*  
 MKY962 MKY5, *rtt107Δ::KANMX6 dot1Δ:: his5MX6 rev3Δ::HYGMX6*  
 MKY963 MKY399, *hht1Δ-hhf1Δ::LEU2 hht2Δ-hhf2Δ::his5MX6 [pRS316, HHT2-HHF2]* (1)  
 MKY964 MKY6, *rtt107Δ::KANMX6 hht1Δ-hhf1Δ::LEU2 hht2Δ-hhf2Δ::his5MX6 [pRS316, HHT2-HHF2]*  
 MKY965 MKY399, *hht1Δ-hhf1Δ::LEU2 hht2Δ-hhf2Δ::his5MX6 [pRS314, hht2K79A-HHF2]*  
 MKY966 MKY6, *rtt107Δ::KANMX6 hht1Δ-hhf1Δ::LEU2 hht2Δ-hhf2Δ::his5MX6 [pRS314, hht2K79A-HHF2]*  
 MKY992 MKY5, *SLX4-3XFLAG::NATMX6*  
 MKY993 MKY5, *rtt107Δ::KANMX6 SLX4-3XFLAG::NATMX6*  
 MKY994 MKY5, *dot1Δ::his5MX6 SLX4-3XFLAG::NATMX6*  
 MKY995 MKY5, *rtt107Δ::KANMX6 dot1Δ::his5MX6 SLX4-3XFLAG::NATMX6*  
 MKY996 MKY5, *RTT107-3XFLAG::NATMX6 lys2Δ*  
 MKY997 MKY5, *slx4Δ::KANMX6 RTT107-3XFLAG::NATMX6*  
 MKY998 MKY7, *dot1Δ::his5MX6 RTT107-3XFLAG::NATMX6 lys2Δ*  
 MKY999 MKY7, *slx4Δ::KANMX6 dot1Δ::his5MX6 RTT107-3XFLAG::NATMX6 lys2Δ*  
 MKY1000 MKY6, *hht1Δ-hhf1Δ::LEU2 hht2Δ-hhf2Δ::his5MX6 [pRS314, hht2K79R-HHF2]*  
 MKY1001 MKY399, *rtt107Δ::KANMX6 hht1Δ-hhf1Δ::LEU2 hht2Δ-hhf2Δ::his5MX6 [pRS314, hht2K79R-HHF2]*  
 MKY1040 *MATα his3Δ1 leu2Δ0 lys2Δ0 ura3Δ0*  
 MKY1041 MKY1040, *rtt107Δ::his5MX6*  
 MKY1042 MKY1040, *dot1Δ::HYGMX6*  
 MKY1043 MKY1040, *rtt107Δ::his5MX6 dot1Δ::HYGMX6*  
 MKY1055 MKY5, *rtt107Δ::KANMX6 [pRS315, RTT107]*  
 MKY1056 MKY5, *rtt107Δ::KANMX6 [pRS315, rtt107-4AQ]*  
 MKY1057 MKY5, *rtt107Δ::KANMX6 [ pRS315]*  
 MKY1058 MKY5, *rtt107Δ::KANMX6 dot1Δ: his5MX6 [pRS315, RTT107]*  
 MKY1059 MKY5, *rtt107Δ::KANMX6 dot1Δ::his5MX6 [pRS315, rtt107-4AQ]*  
 MKY1060 MKY5, *rtt107Δ::KANMX6 dot1Δ::his5MX6 [pRS315]*  
 MKY1082 MKY5, *slx4Δ::KANMX6 dot1Δ::his5MX6 [pRS315]*  
 MKY1083 MKY5, *slx4Δ::KANMX6 dot1Δ::his5MX6 [pRS315, DOT1]*  
 MKY1084 MKY5, *slx4Δ::KANMX6 dot1Δ::his5MX6 [pRS315, dot1 G401A]*  
 MKY1085 MKY5, *slx4Δ::KANMX6 dot1Δ::his5MX6 [pRS315, dot1 G401R]*  
 MKY1086 MKY6, *slx4Δ::KANMX6 hht1Δ-hhf1Δ::LEU2 hht2Δ-hhf2Δ::his5MX6 [pRS314, HHT2-HHF2]*  
 MKY1087 MKY6, *slx4Δ::KANMX6 hht1Δ-hhf1Δ::LEU2 hht2Δ-hhf2Δ::his5MX6 [pRS314, hht2K79A-HHF2]*  
 MKY1088 MKY6, *slx4Δ::KANMX6 hht1Δ-hhf1Δ::LEU2 hht2Δ-hhf2Δ::his5MX6 [pRS314, hht2K79R-HHF2]*  
 MKY1094 MKY6, *ars603.5Δ::URA3 ars608Δ::HIS3 ars609Δ::TRP1 LEU2::BrdU-Inc* (2)  
 MKY1095 MKY6, *ars603.5Δ::URA3 ars608Δ::HIS3 ars609Δ::TRP1 LEU2::BrdU-Inc rtt107Δ::KANMX6*  
 MKY1096 MKY6, *ars603.5Δ::URA3 ars608Δ::HIS3 ars609Δ::TRP1 LEU2::BrdU-Inc dot1Δ::HYGMX6*  
 MKY1097 MKY6, *ars603.5Δ::URA3 ars608Δ::HIS3 ars609Δ::TRP1 LEU2::BrdU-Inc rtt107Δ::KANMX6 dot1Δ::HYGMX6*

---

\* unless otherwise indicated, all strains were constructed for this work (details available upon request) or were from the laboratory collections. All strains are in the W303 background, except strains MKY1040-MKY1043, which are in the S288C background.

## References

1. Yang, B., and Kirchmaier, A. L. (2006) *Mol. Biol. Cell* **17**, 5287-5297
2. Viggiani, C. J., and Aparicio, O. M. (2006) *Yeast* **23**, 1045-1051

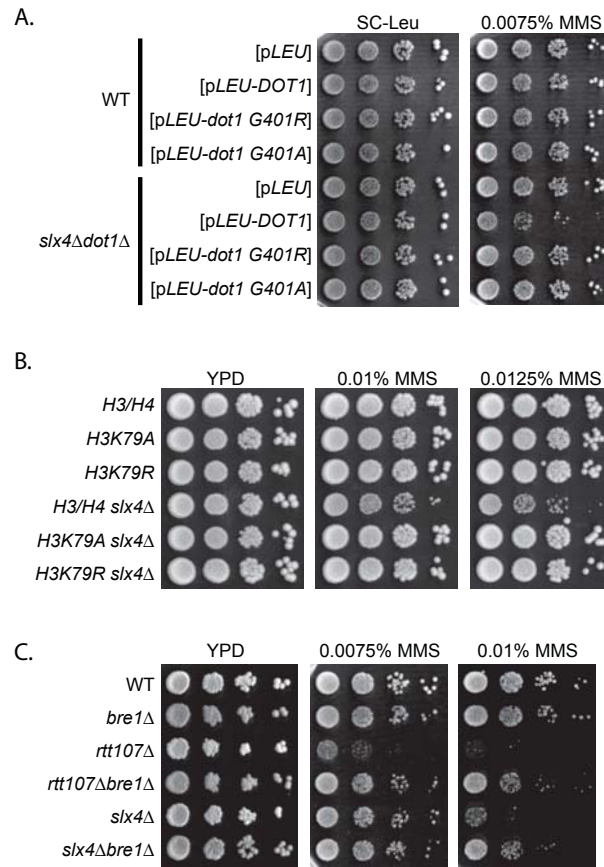

**Supplementary Figure 1. Abrogation of H3 K79 trimethylation suppressed the MMS sensitivity of strains lacking Slx4.** Tenfold serial dilutions of the indicated strains were plated onto media containing 0.0075% , 0.01% , or 0.0125% MMS. (A) Loss of Dot1's catalytic activity, (B) H3 K79A, K79R, or (C) loss of Bre1 suppressed MMS sensitivity of *slx4Δ* mutants.

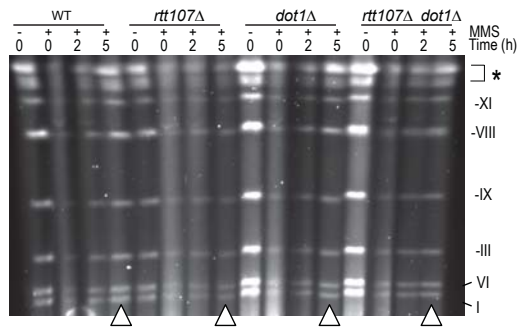

**Supplementary Figure 2. Requirement of Rtt107 for resumption of replication after DNA damage was partially suppressed by deletion of *DOT1*.** PFGE analysis indicated *rtt107Δdot1Δ* mutants had more efficient DNA replication after DNA damage than *rtt107Δ* mutants.  
 \* : unresolved chromosomes.

## SUPPLEMENTARY METHODS

**MMS Sensitivity Measurements** – Overnight cultures grown in YPD or SC-Leu at 30°C were diluted to 0.3 O.D<sub>600</sub>. The cells were tenfold serially diluted and spotted onto solid YPD plates or SC-Leu plates with MMS (Sigma) at various concentrations. The plates were then incubated at 30°C for 2-3 days.

**Pulsed-Field Gel Electrophoresis** – Briefly, cells were arrested in G1 by addition of 2 µg/ml of  $\alpha$ -factor for 2 h at 30°C in YPD, then washed with sterile 1X PBS and resuspended in YPD containing 0.03% MMS for 1 h. MMS was removed by treating with 2% sodium thiosulfate and washing with sterile 1X PBS. The cells were resuspended in YPD and incubated at 30°C during the recovery phase. Aliquots were removed at the indicated times and processed further.

Cells were treated using the CHEF Yeast Genomic DNA Plug Kit (Bio-Rad, CA). As described by the manufacturer, cells were washed with cold 50 mM EDTA and resuspended in Cell Suspension Buffer containing 0.75% agarose and Lyticase, and incubated for 2 h at 37°C. The agarose plugs were incubated with Proteinase K overnight at 50°C, then washed and loaded onto a 1.0% agarose gel in 0.5X Tris-borate EDTA. Pulsed-field gel electrophoresis was carried out as described by the manufacturer (GE Healthcare, UK). Briefly, the gel was subjected to electrophoresis at 100 V with a switch time of 60–120 s for 24 h with constant recirculation of the buffer at 8.5°C. Following electrophoresis, the gels were stained with ethidium bromide (0.5 µg/ml) and photographed.
